# Supplementary material for: Representation of Spatial Variability of the Water Fluxes over the Congo Basin Region
Source: MDPI journal article supplement (doi:10.3390/s22010084), 2021-12-23
Supplement: s1 [file s1]

Supporting Information for

**Representation of spatial variability of the moisture flux over the Congo Basin region**

*Marc De Benedetti<sup>1,2</sup>*

*G.W.K. Moore<sup>1,2</sup>*

*Xiaoyong Xu<sup>2</sup>*

*<sup>1</sup>Department of Physics, University of Toronto*

*<sup>2</sup>Department of Chemical and Physical Sciences, University of Toronto Mississauga*

**Table of Contents**

|      |           |          |
|------|-----------|----------|
| i)   | Figure S1 | page 2   |
| ii)  | Figure S2 | page 3   |
| iii) | Figure S3 | page 4   |
| iv)  | Figure S4 | page 5   |
| v)   | Figure S5 | page 6-7 |
| vi)  | Figure S6 | page 8   |
| vii) | Figure S7 | page 9   |

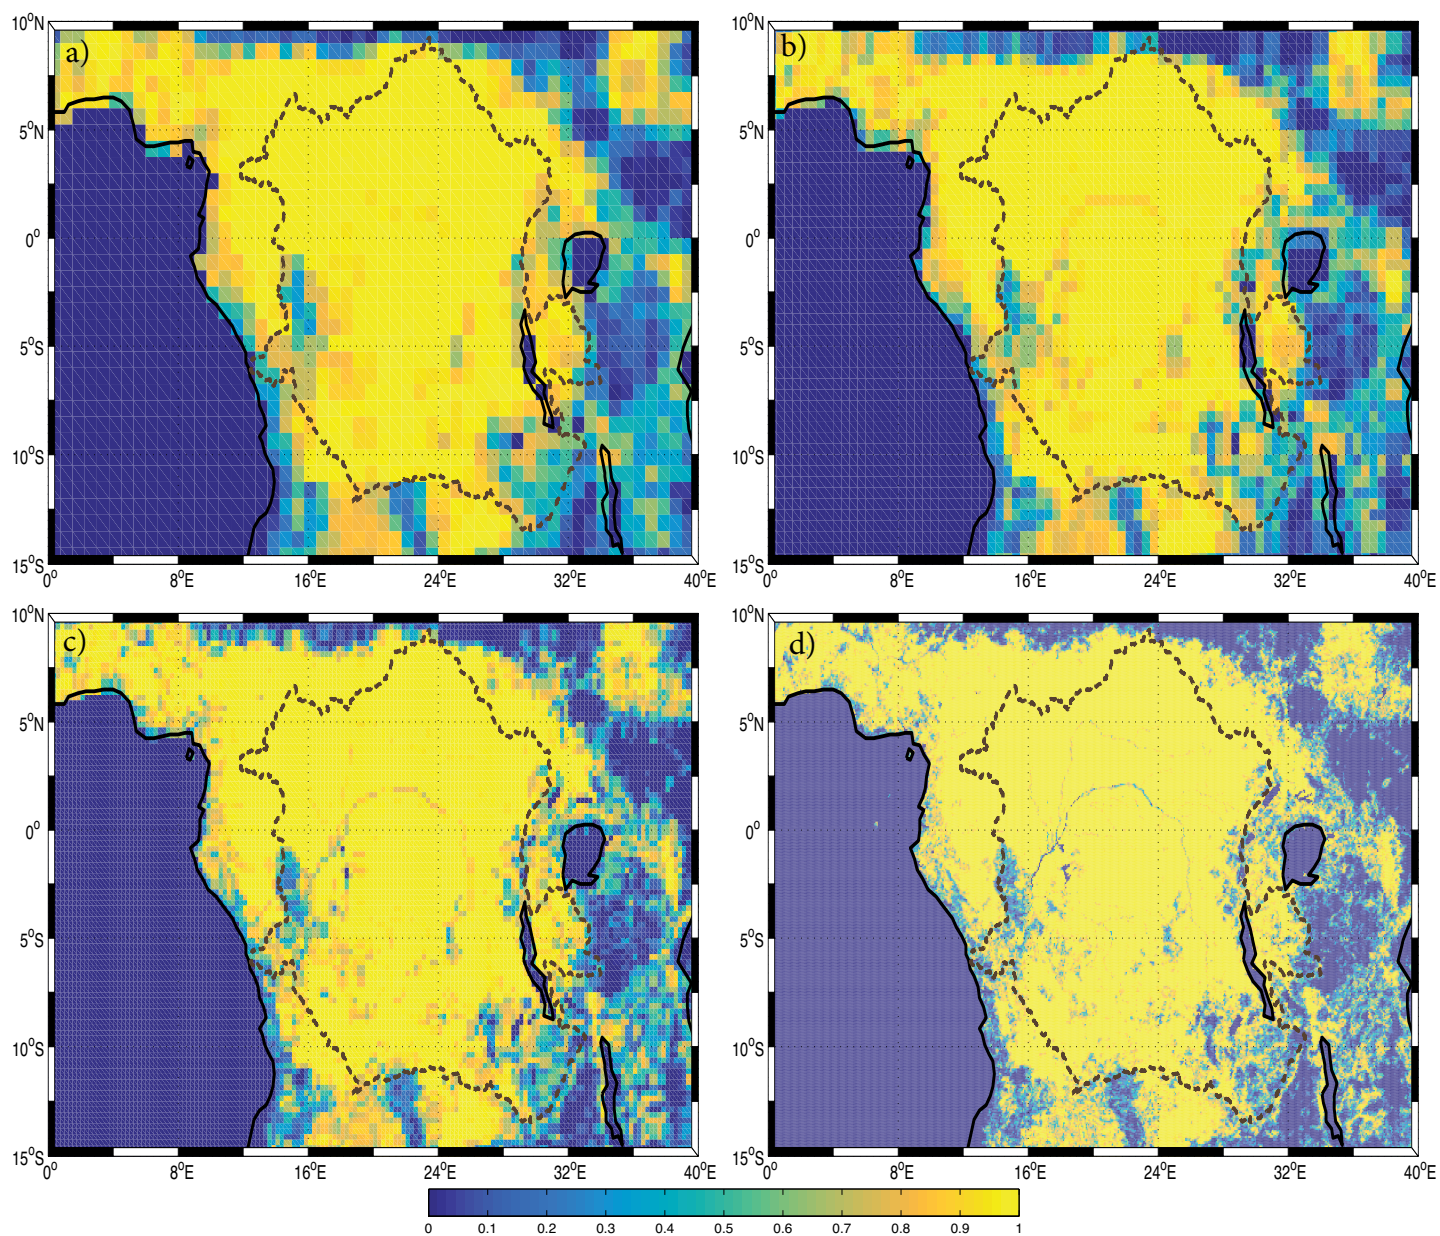

Figure S1: Shows the amounts of high vegetation (as a percentage of area covered) for the a) ERA-I; b) EERA5; c) ERA5; and d) ECOA.

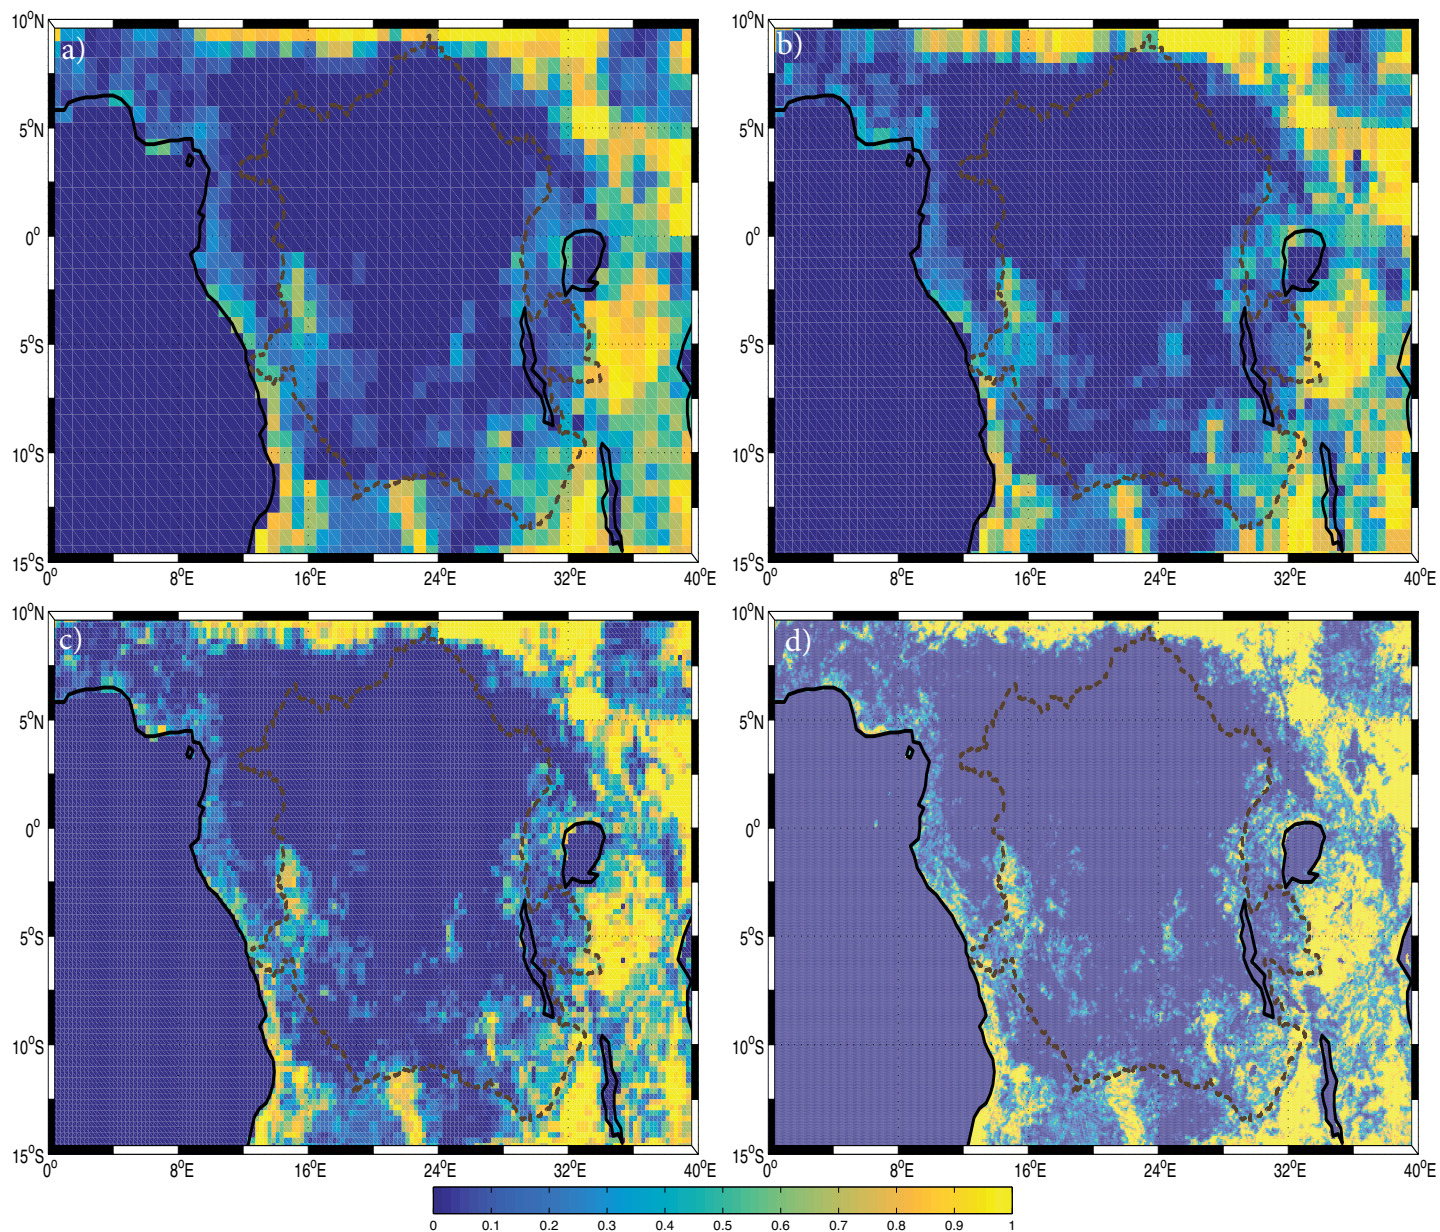

Figure S2: Shows the amounts of low vegetation (as a percentage of area covered) for the a) ERA-I; b) EERA5; c) ERA5; and d) ECOA.

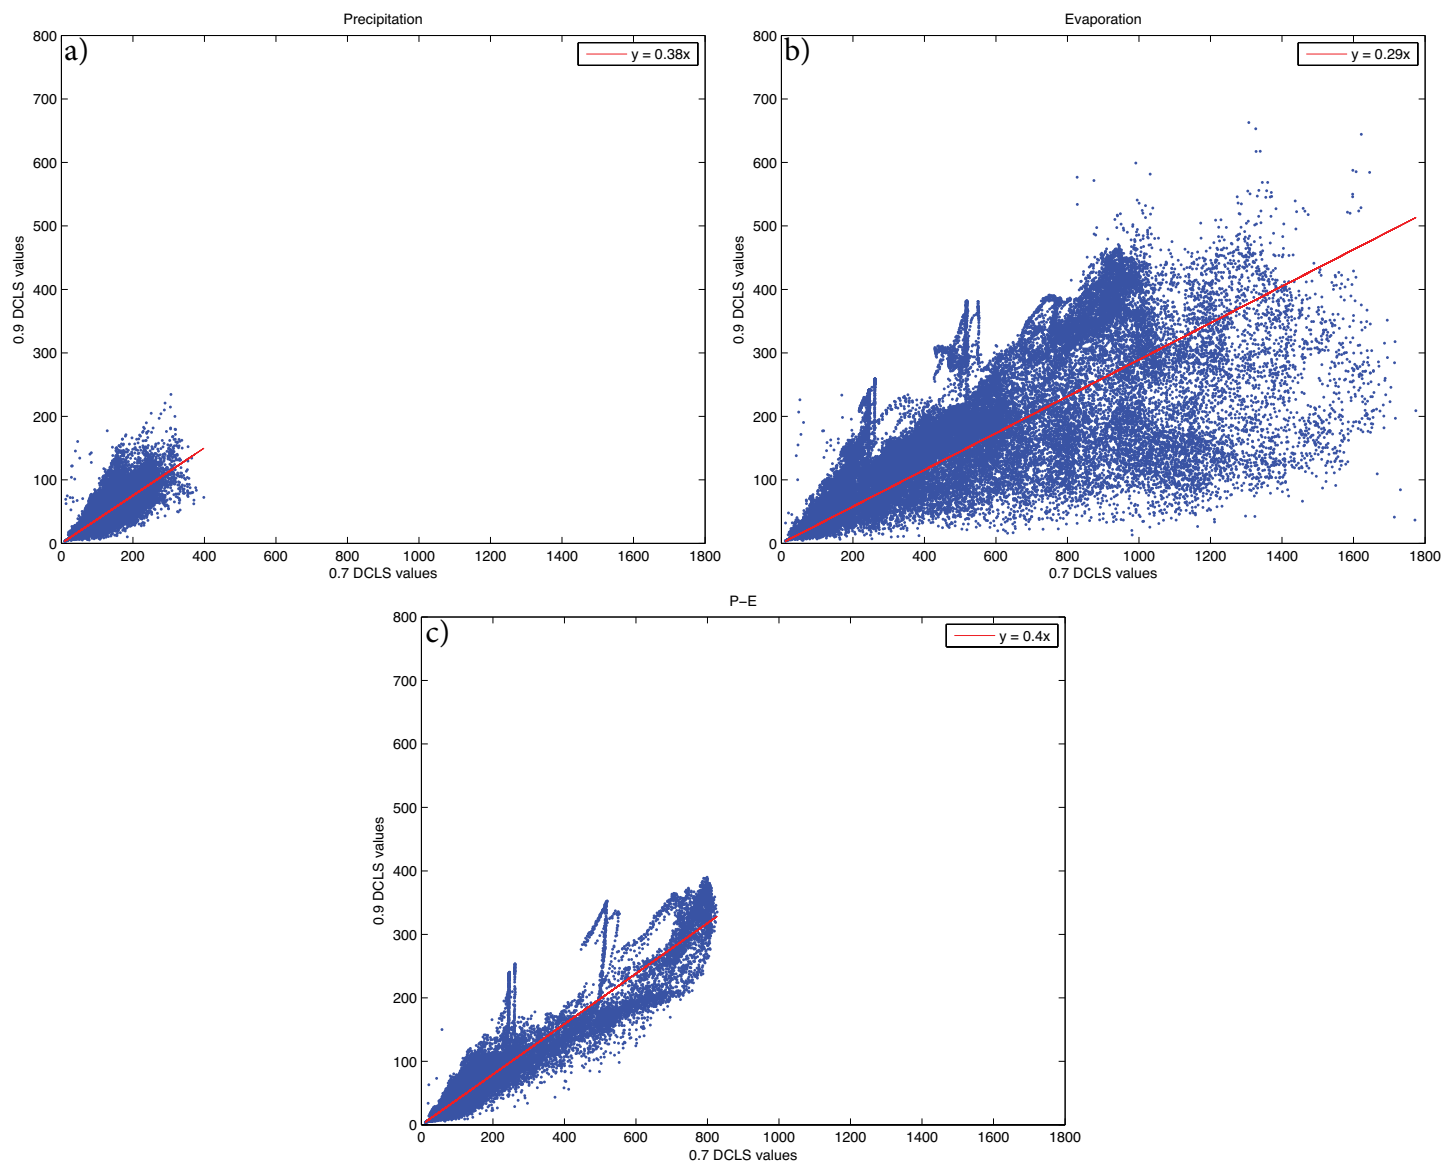

Figure S3: Comparison between DCLS values using a prescribed 0.7 contour and a 0.9 contour for the a) precipitation field, b) evaporation field, and c) the P-E field for the ERA5 dataset over the domain shown in the other figures.



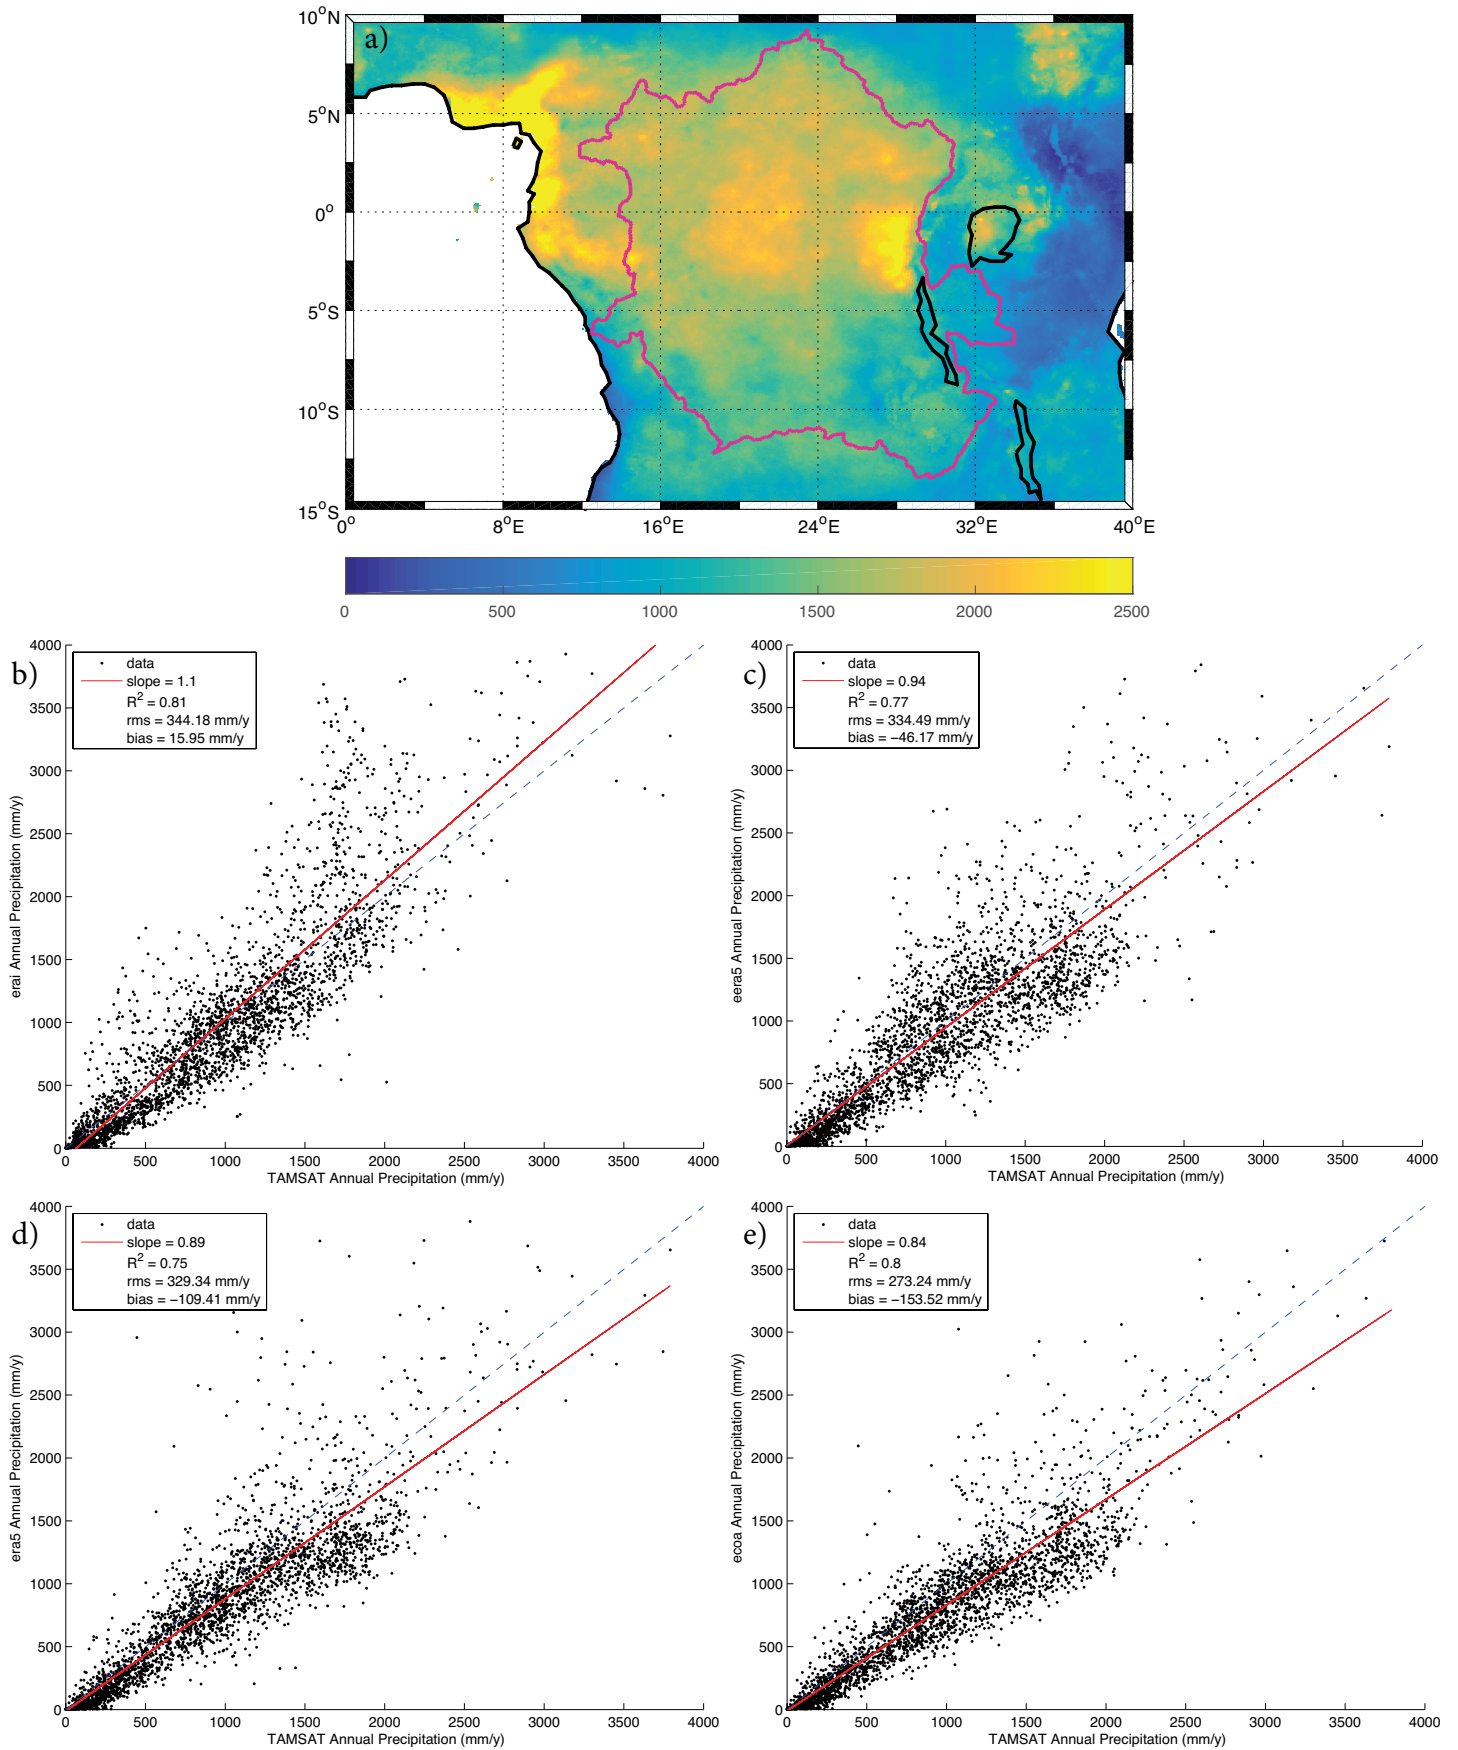

Figure S4: a) Annual mean precipitation (mm/y) from TAMSAT-3 for 2016-2017. Below panel a) are scatter plots comparing TAMSAT-3 precipitation to the b) ERA-I, c) eERA5, d) ERA5, and e) ECOA dataset using common grid points between each of the five datasets. In panels b) - e), the red line is the line of best fit, and the blue dotted line represents the 1-to-1 line.

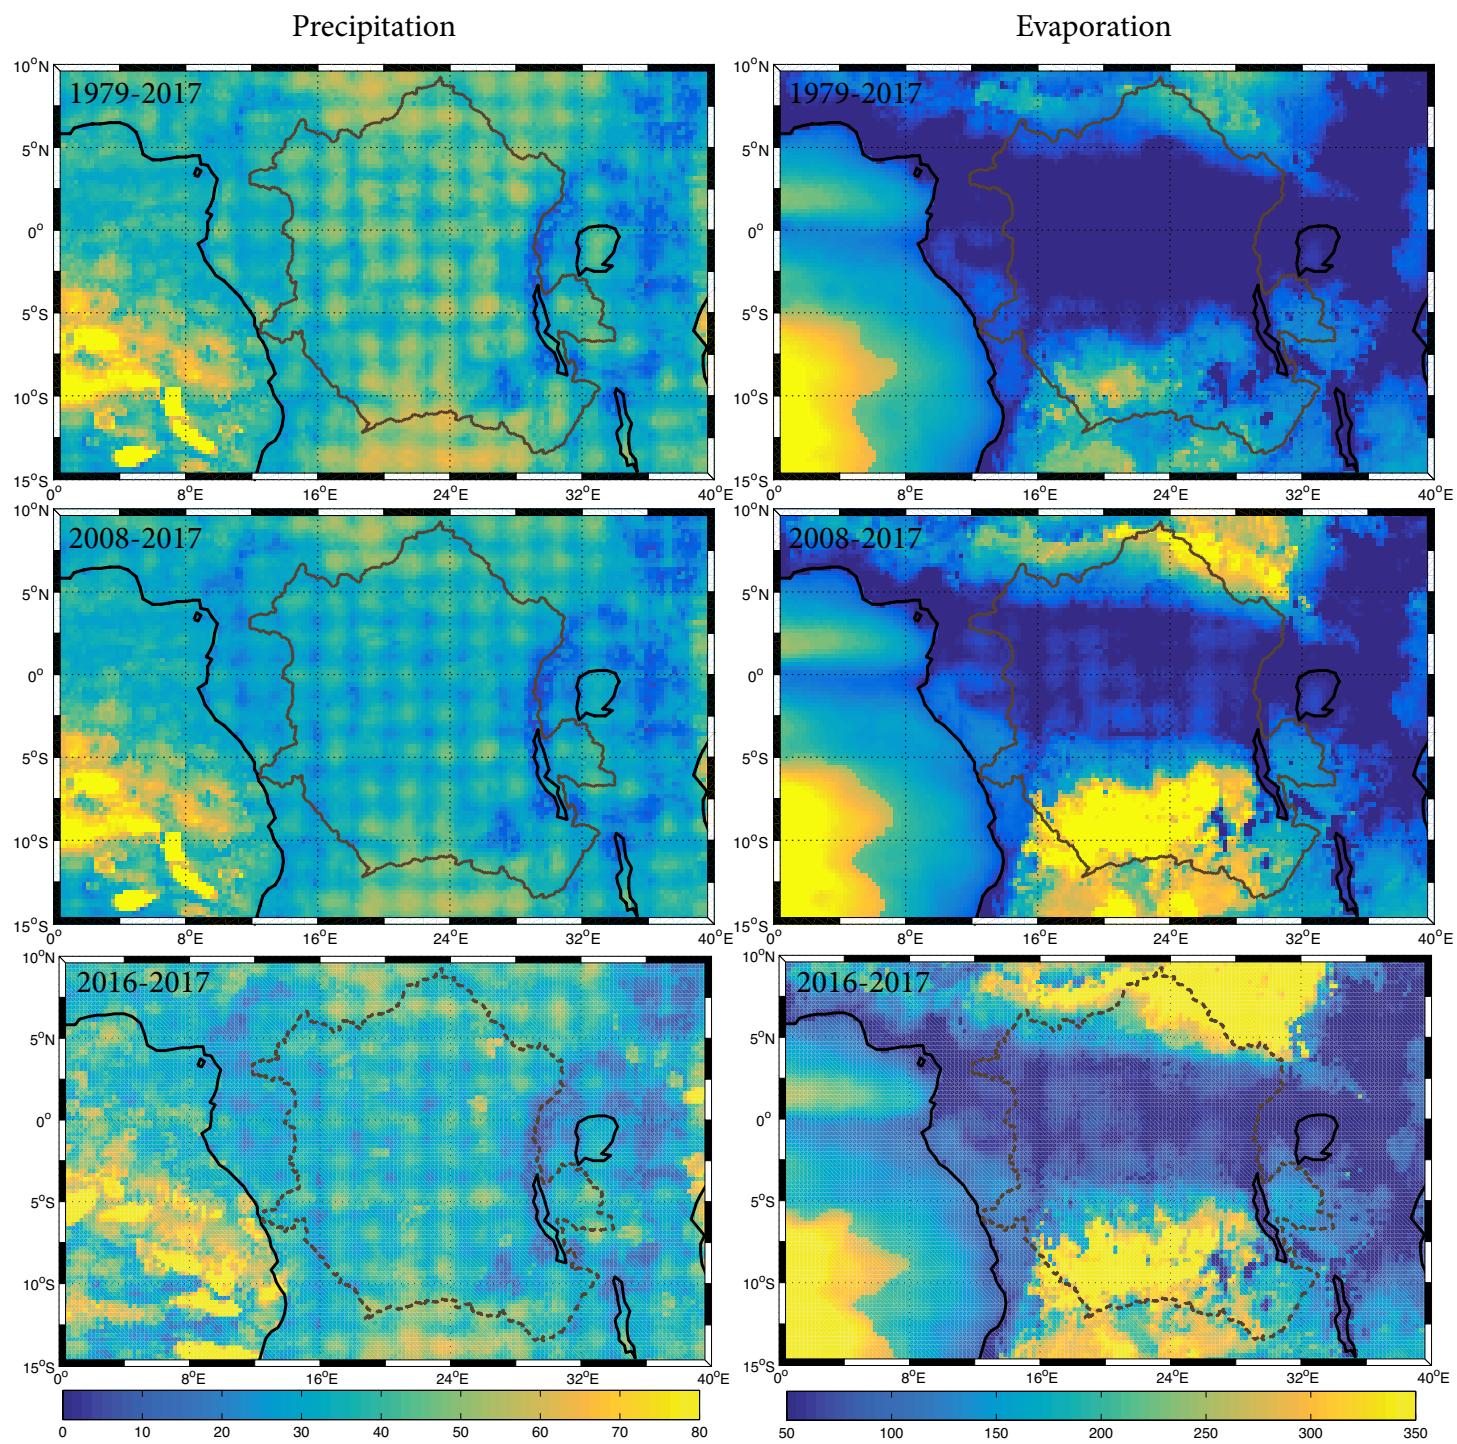

Figure S5a: The decorrelation length scale (km) of the precipitation (left column) and evaporation (right column) from the ERA5 over three different time spans to show convergence of results using only a two-year window.

P-E

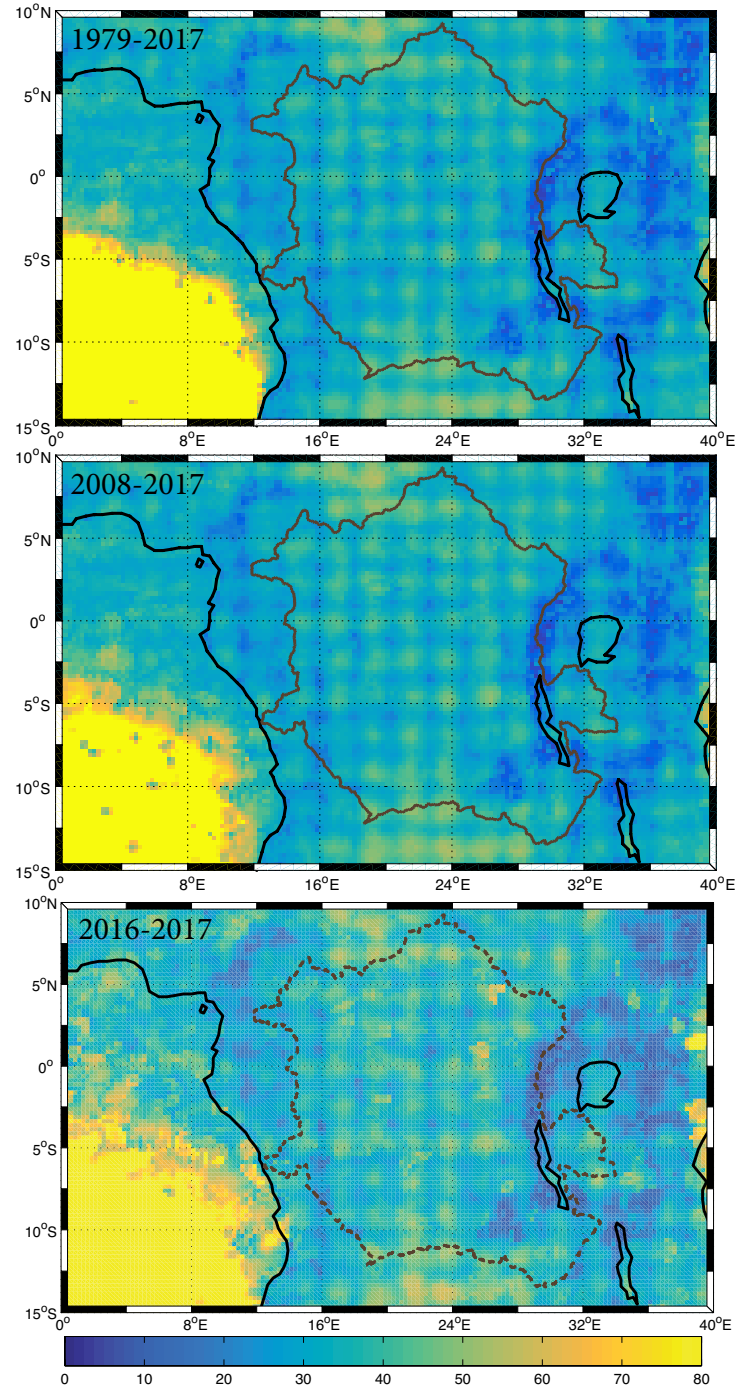

Figure S5b: The decorrelation length scale (km) of the P-E field from the ERA5 over three different time spans to show convergence of results using only a two-year window.

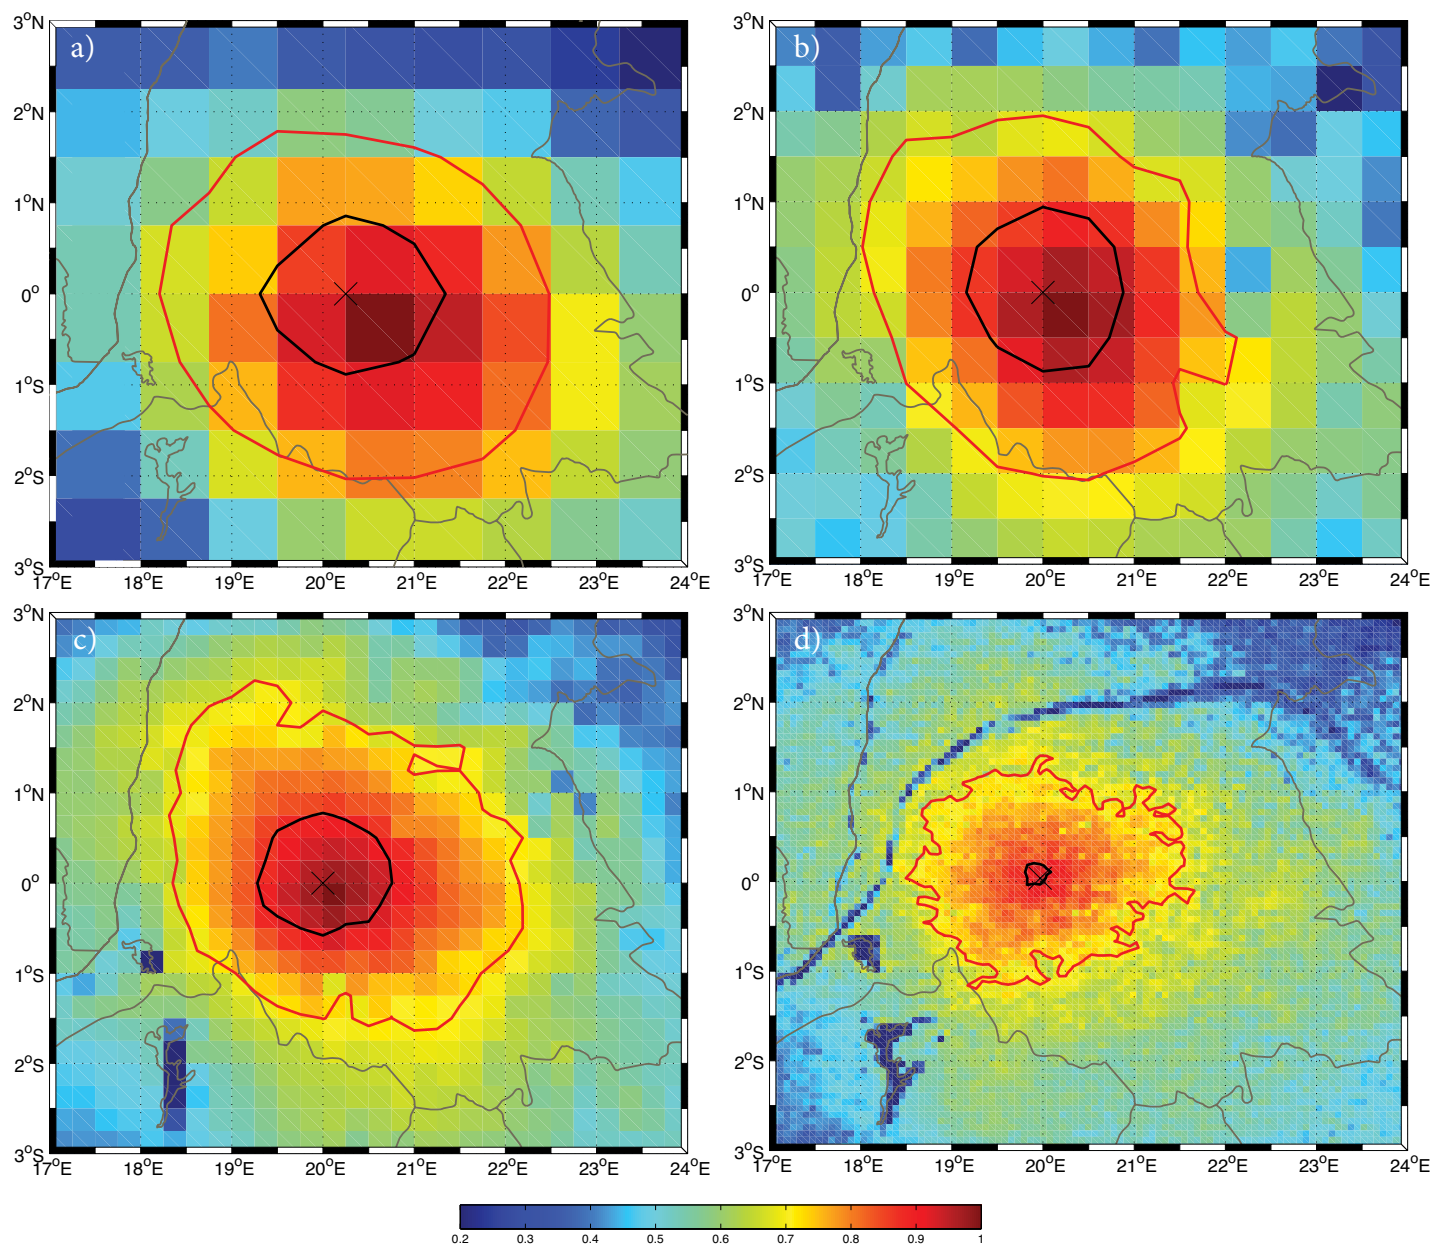

Figure S6: An example of the DCLS calculation of evaporation field for the the a) ERA-I; b) EERA5; c) ERA5; and d) ECOA datasets from 2016-2017. The background color represents the correlation coefficient values, and the black contour represents the 0.9 contour level and the red contour represents the 0.7 contour level.



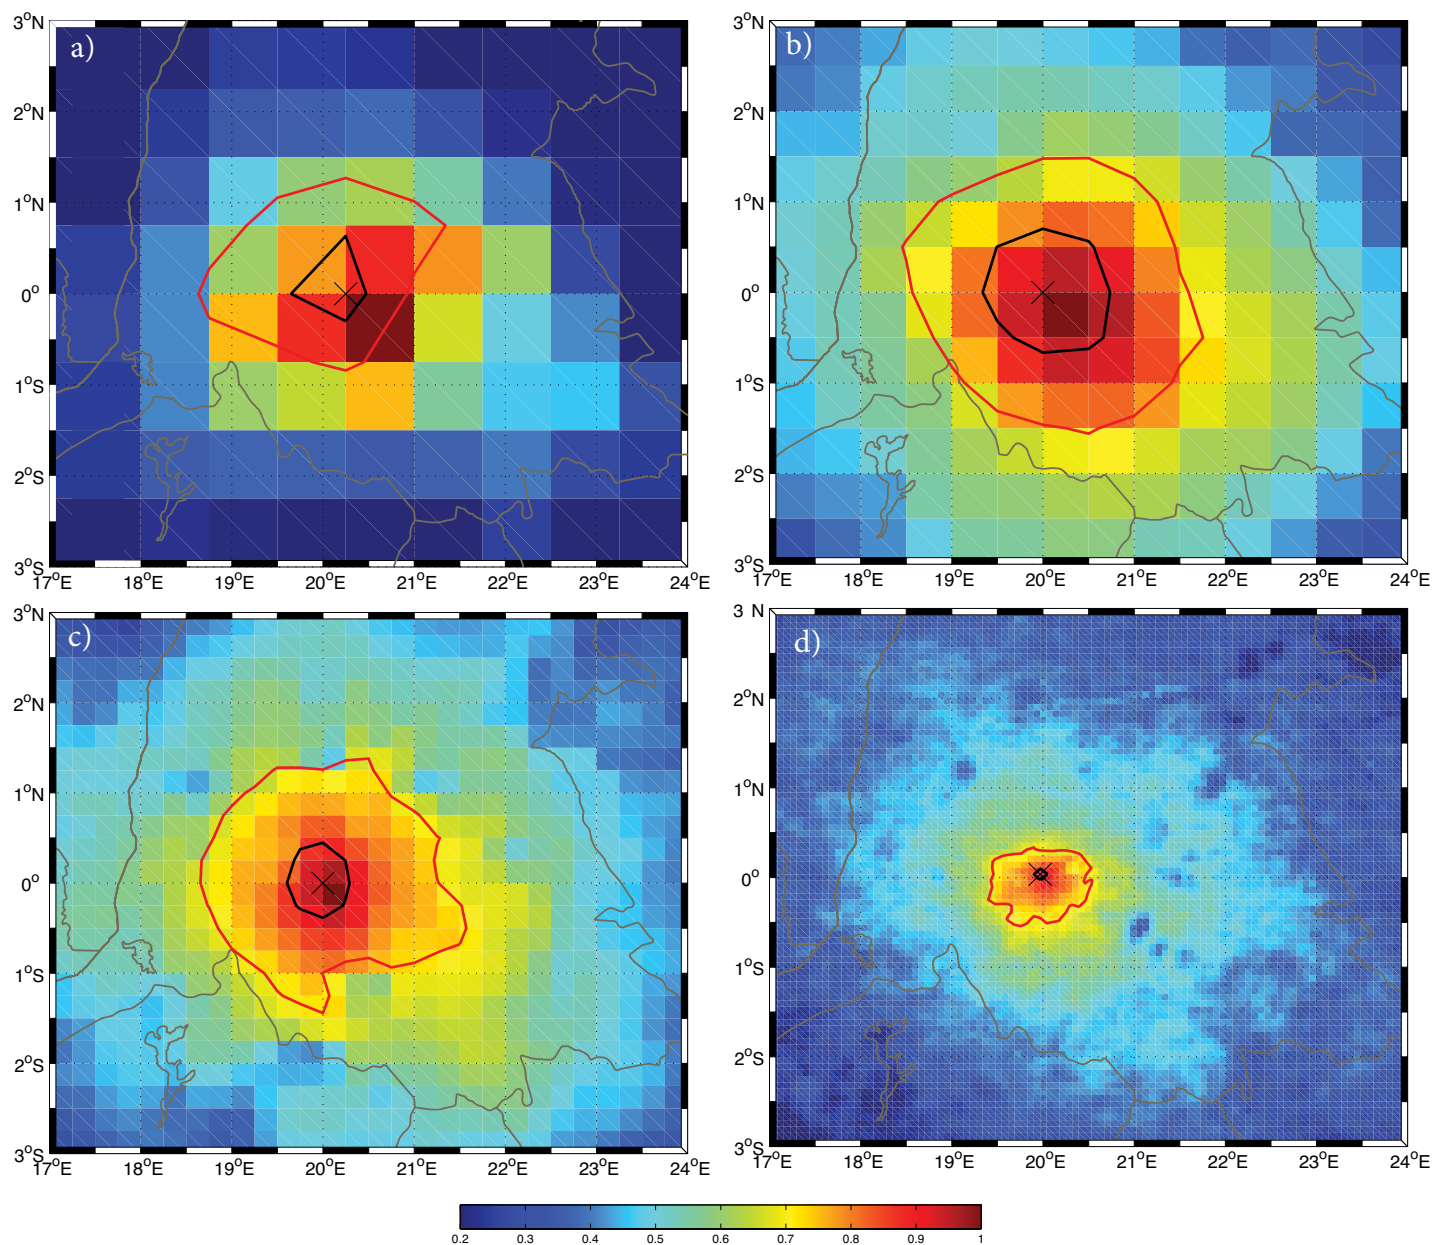

Figure S7: An example of the DCLS calculation of the precipitation field for the the a) ERA-I; b) EERA5; c) ERA5; and d) ECOA datasets from 2016-2017. The background color represents the correlation coefficient values, and the black contour represents the 0.9 contour level and the red contour represents the 0.7 contour level.
